# Supplementary material for: Evidence of the Involvement of a Cyclase Gene in the Biosynthesis of Ochratoxin A in Aspergillus carbonarius
Source: MDPI journal article supplement (doi:10.3390/toxins13120892), 2021-12-13
Supplement: s1 [file s1]

## Supplementary Materials: Evidence of the Involvement of a Cyclase Gene in the Biosynthesis of Ochratoxin A in *Aspergillus carbonarius*

Massimo Ferrara, Antonia Gallo, Carla Cervini, Lucia Gambacorta, Michele Solfrizzo, Scott E. Baker and Giancarlo Perrone

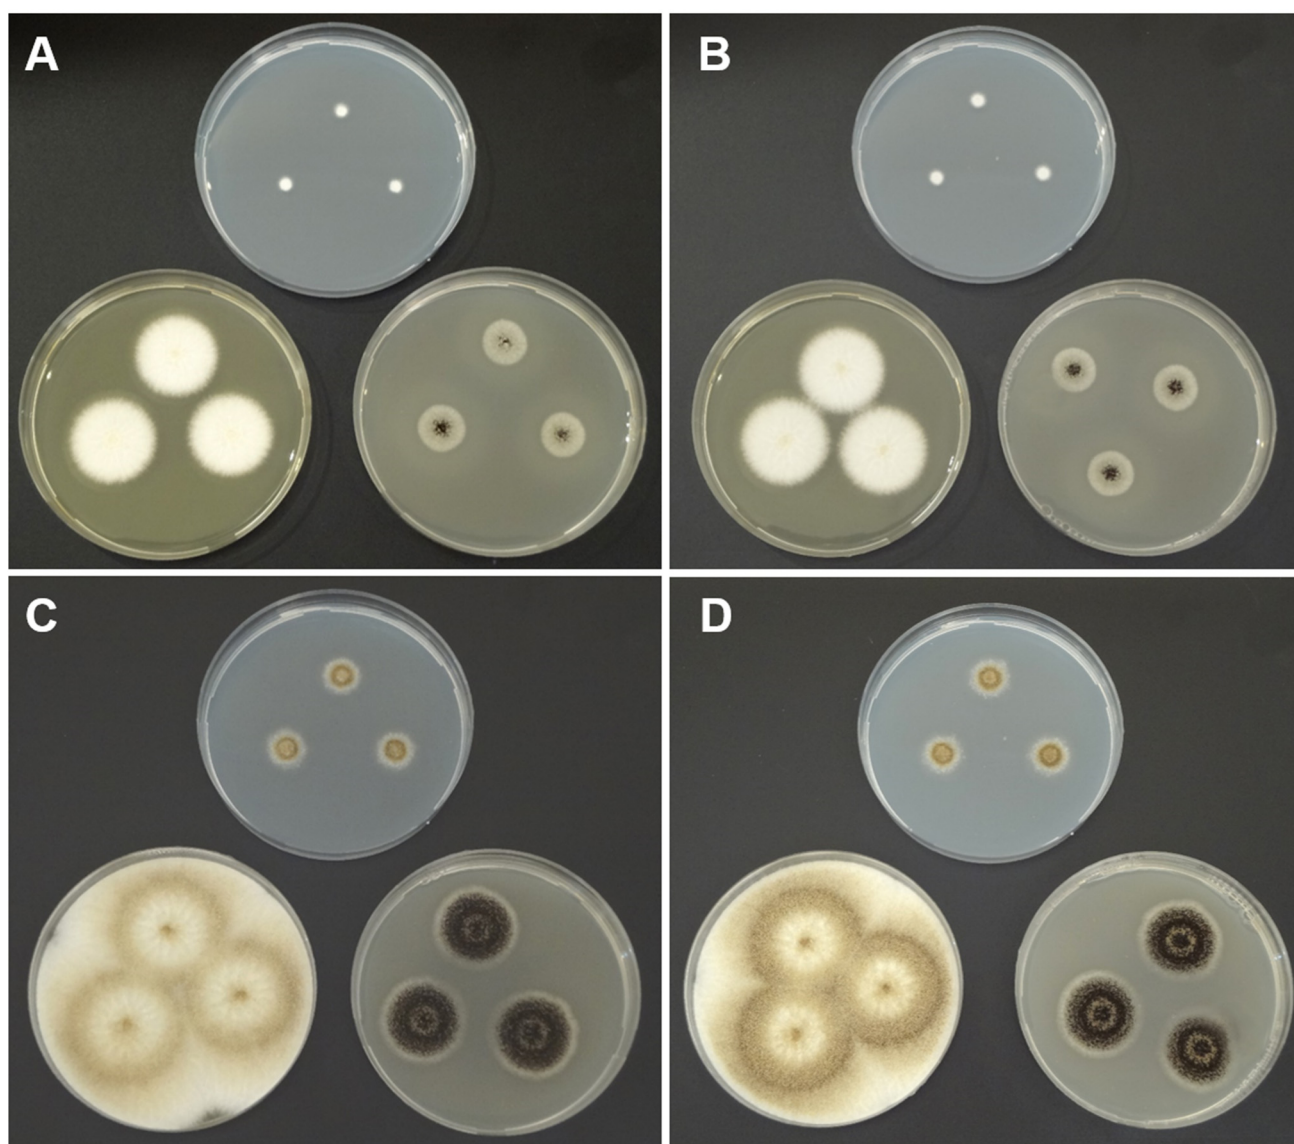

**Figure S1.** Colonies (clockwise from the top) on Czapek yeast extract agar (CYA), malt extract agar (MEA), and yeast extract sucrose (YES) after three and five days of incubation at 25°C in the dark of *A. carbonarius* wild type strain ITEM 5010 (A and C) and *A. carbonarius*  $\Delta$ *otaY* deletion mutant strain AC2021 (B and D).

---

|     |                                                                         |     |
|-----|-------------------------------------------------------------------------|-----|
| 1   | ATGACCACACCCACACCCACAACCCTCAAACACCACGCCACCACCATCCTCACCACCCTTGTCAACGACC  | 70  |
| 71  | GCCAAACCGCCGCCATCGAACACCTCCTCCACCCCACCATCACCTCAAACACAATGACCTCCCCGCCAT   | 140 |
| 141 | GAGTAAATCCGAGCTCATTGCCTTCTGGCCCGAGGTGTTAGCCCAGAGTCCCCATTTCCGGGTCCAGATC  | 210 |
| 211 | CGGGATGTTATTGCCGAGGGGAATAAGGTGTGGGTTTATTTCGCGCGTGGAGGGGAGACTTGGGGAGGGGG | 280 |
| 281 | TGATGGATGATTTTCATATGATGGTTTTTGATGAGGAGGGGTGGTGGTGAGGAGTACGGGGGTGCAGAG   | 350 |
| 351 | GGTTGTTGAGGGGGAGATGTAG                                                  | 372 |

**Figure S2.** Nucleotide sequence of *Aspergillus carbonarius otaY* polyketide cyclase (NCBI accession number MT706047).
